# Supplementary material for: Wavefront manipulation based on transmissive acoustic metasurface with membrane-type hybrid structure
Source: PubMed Central journal article supplement (PMC6155023; doi:10.1038/s41598-018-32547-3), 2018-09-21
Supplement: 41598_2018_32547_MOESM1_ESM.pdf [file 41598_2018_32547_MOESM1_ESM.pdf]

**Supplementary Information: Wavefront manipulation based on transmissive acoustic metasurface with membrane-type hybrid structure**

Jun Lan<sup>1</sup>, Xiaowei Zhang<sup>1</sup>, Xiaozhou Liu<sup>1,a)</sup>, Yifeng Li<sup>2,b)</sup>

<sup>1</sup>Key Laboratory of Modern Acoustics, Institute of Acoustics and School of Physics, Collaborative Innovation Center of Advanced Microstructures, Nanjing University, Nanjing 210093, P. R. China

<sup>2</sup>College of Computer Science and Technology, Nanjing Tech University, Nanjing 211800, P. R. China

**1. The acoustic impedance of the 1-dimensional membrane**

In this paper, the 1-dimensional (1-D) membrane is modeled as a thin plate, which is characterized by its mass density  $\rho_m$ , Young's modulus  $E$ , Poisson's ratio  $\nu$ , thickness  $d$  and width

$l$ . The transverse displacement of the 1-D membrane  $\xi$  satisfies the flexural wave equation<sup>1</sup>

$$\nabla^4 \xi - k_m^4 \xi = \frac{\Delta p}{D}, \quad (1)$$

where  $k_m^2 = \omega \sqrt{\rho_m''/D}$  and  $\rho_m'' = \rho_m d$ ,  $\Delta p = p_1 - p_2$  is the pressure difference across the membrane,  $p_1$  and  $p_2$  are the acoustic pressure on the both sides of the 1-D membrane.  $D$  represents the flexural rigidity, which is given by

$$D = \frac{Ed^3}{12(1-\nu^2)}. \quad (2)$$

According to factorization method, Eq. (1) can be rewritten as

$$(\nabla^2 + k_m^2)(\nabla^2 - k_m^2)\xi = \frac{\Delta p}{D}. \quad (3)$$

Here, the 1-D membrane is placed along the  $y$ -axis and clamped at its edges to a straight pipe, as shown in Fig. 1s. Assuming a uniform pressure distribution across the membrane, the following general solution for the transverse displacement  $\xi(y)$  can be obtained

$$\xi(y) = -\frac{\Delta p}{k_m^4 D} + A \cos(k_m y) + B \sin(k_m y) + E e^{k_m y} + F e^{-k_m y}. \quad (4)$$

The 1-order differential coefficient of  $\xi(y)$  can be expressed as

$$\frac{d\xi(y)}{dx} = -A k_m \sin(k_m y) + B k_m \cos(k_m y) + E k_m e^{k_m y} - F k_m e^{-k_m y}, \quad (5)$$

where  $A$ ,  $B$ ,  $E$  and  $F$  represent the four constants. As shown in Fig. 1s, there are four boundary

conditions corresponding to the 1-D clamped membrane:  $\xi(y=l)=0$ ,  $\frac{d\xi}{dy}|_{y=l}=0$ ,  $\xi(y=0)=0$ ,

and  $\frac{d\xi}{dy}|_{y=0}=0$ . By substituting these four boundary conditions into Eq. (4), which is given by

$$\begin{cases} A + E + F = \frac{\Delta p}{k_m^4 D} & (\xi(y=0)=0) \\ A \cos(k_m l) + B \sin(k_m l) + E e^{k_m l} + F e^{-k_m l} = \frac{\Delta p}{k_m^4 D} & (\xi(y=l)=0) \\ B k_m + E k_m - F k_m = 0 & (d\xi/dy(y=0)=0) \\ -A k_m \sin(k_m l) + B k_m \cos(k_m l) + E k_m e^{k_m l} - F k_m e^{-k_m l} = 0 & (d\xi/dy(y=l)=0) \end{cases} \quad (6)$$

Equation (6) can be rewritten as

$$\begin{pmatrix} 1 & 0 & 1 & 1 \\ \cos(k_m l) & \sin(k_m l) & e^{k_m l} & e^{-k_m l} \\ 0 & k_m & k_m & -k_m \\ -k_m \sin(k_m l) & k_m \cos(k_m l) & k_m e^{k_m l} & -k_m e^{-k_m l} \end{pmatrix} \begin{pmatrix} A \\ B \\ E \\ F \end{pmatrix} = \begin{pmatrix} 1 \\ 1 \\ 0 \\ 0 \end{pmatrix} \frac{\Delta p}{k_m^4 D}. \quad (7)$$

Here, since the coefficient  $\Delta p/(k_m^4 D)$  can be easily eliminated with normalization, we will assume  $A, B, E, F$  as the non-dimensional coefficient in the following discussion. Then from Eq. (7), we can obtain

$$\begin{cases} A = 1 - E - F \\ B = F - E \end{cases}. \quad (8)$$

By substituting Eq. (8) into Eq. (7), which gives

$$\begin{cases} (e^{k_m l} - \cos(k_m l) - \sin(k_m l))E + (e^{-k_m l} - \cos(k_m l) + \sin(k_m l))F = 1 - \cos(k_m l) \\ (e^{k_m l} - \cos(k_m l) + \sin(k_m l))E + (-e^{-k_m l} + \cos(k_m l) + \sin(k_m l))F = \sin(k_m l) \end{cases}. \quad (9)$$

Equation (9) can be rewritten as

$$\begin{pmatrix} e^{k_m l} - \cos(k_m l) - \sin(k_m l) & e^{-k_m l} - \cos(k_m l) + \sin(k_m l) \\ e^{k_m l} - \cos(k_m l) + \sin(k_m l) & -e^{-k_m l} + \cos(k_m l) + \sin(k_m l) \end{pmatrix} \begin{pmatrix} E \\ F \end{pmatrix} = \begin{pmatrix} 1 - \cos(k_m l) \\ \sin(k_m l) \end{pmatrix}. \quad (10)$$

Therefore, the four constants of Eq. (4) can be expressed as

$$\begin{cases} E = \frac{b_1 \times a_4 - b_2 \times a_2}{a_1 \times a_4 - a_2 \times a_3} \\ F = \frac{b_2 \times a_1 - b_1 \times a_3}{a_1 \times a_4 - a_2 \times a_3} \\ A = 1 - E - F \\ B = F - E \end{cases}, \quad (11)$$

where  $a_1 = e^{k_m l} - \cos(k_m l) - \sin(k_m l)$ ,  $a_2 = e^{-k_m l} - \cos(k_m l) + \sin(k_m l)$ ,  $a_3 = e^{k_m l} - \cos(k_m l) + \sin(k_m l)$ ,

$a_4 = -e^{-k_m l} + \cos(k_m l) + \sin(k_m l)$ ,  $b_1 = 1 - \cos(k_m l)$  and  $b_2 = \sin(k_m l)$ . Generally, the acoustic

impedance of the 2-dimensional circular membrane can be defined as  $Z_{am} = \iint_S \Delta p dS / (j\omega \bar{\xi} S^2)$ , In

our 1-D membrane, the cross-sectional area of the membrane  $S$  is the width of the 1-D membrane  $l$ .

Therefore, the acoustic impedance of the 1-D membrane is given by

$$Z_{am} = \frac{\int_l \Delta p(y) dl}{j\omega \bar{\xi} l^2}, \quad (12)$$

where  $\bar{\xi} = (1/l) \int_l \xi(y) dl$  is the average transverse displacement over the membrane surface. Here,

assuming a uniform pressure distribution over the membrane, by substituting Eq. (4) into Eq. (12),

the acoustic impedance of the 1-D membrane can be given by

$$\begin{aligned} Z_{am} &= \frac{\int_l \Delta p(y) dl}{j\omega \bar{\xi} l^2} = \frac{\Delta p l}{j\omega \frac{\Delta p}{k_m^4 D} \frac{1}{l} \int_0^l -1 + A \cos(k_m y) + B \sin(k_m y) + E e^{k_m y} + F e^{-k_m y} dl \times l^2} \\ &= \frac{k_m^4 D}{j\omega \left[ -y + \frac{A}{k_m} \sin(k_m y) - \frac{B}{k_m} \cos(k_m y) + \frac{E}{k_m} e^{k_m y} - \frac{F}{k_m} e^{-k_m y} \right]_0^l} \\ &= \frac{k_m^4 D}{j\omega \left[ -l + \frac{A}{k_m} \sin(k_m l) - \frac{B}{k_m} \cos(k_m l) + \frac{B}{k_m} + \frac{E}{k_m} e^{k_m l} - \frac{E}{k_m} - \frac{F}{k_m} e^{-k_m l} + \frac{F}{k_m} \right]} \end{aligned} \quad (13)$$

where the expressions of  $A$ ,  $B$ ,  $E$  and  $F$  have been presented in Eq. (11). Therefore, the effective

acoustic impedance of the 1-D membrane can be derived from Eq. (13), and the membrane provides

an effective acoustic reactance to shift the phase of the incident acoustic wave over the whole  $2\pi$

range and realize the highly efficient transmission.

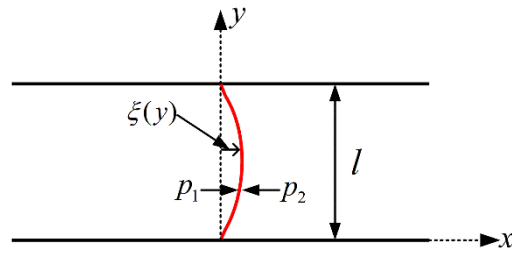

Figure 1s. 1-dimensional membrane clamped to a straight pipe. Red solid line refers to the 1-dimensional membrane.

#### Supplementary References

1. Bongard, F., Lissek, H. & Mosig, J. R. Acoustic transmission line metamaterial with negative/zero/positive refractive index. *Phys. Rev. B* **82**, 94306 (2010).
